# Supplementary material
Source: publisher figshare collection journal article supplement (https://gsapubs.figshare.com/articles/dataset/_/12542630)
Supplement: Supplementary file 1 [file 1]

## Sheet: Sheet1
Depth(m)	Sand	Silt	Clay	Mz-μm	D90	>125(%)
1.02147	19.2919	74.2995	6.40853	24.986	73.446	3.69159
1.06433	18.3405	73.9815	7.67798	23.682	70.212	1.97708
1.10719	19.7788	72.6959	7.52528	26.936	70.337	0.944514
1.15005	19.1608	73.1405	7.69872	24.897	71.374	1.93983
1.19291	16.9848	76.093	6.92223	24.039	68.16	1.91188
1.23577	15.4345	75.8432	8.72223	20.01	65.914	1.63157
1.27863	21.5701	70.7947	7.63518	26.637	75.799	2.67076
1.32149	16.0541	75.7226	8.22331	21.42	66.894	1.72097
1.36435	17.0003	75.1264	7.87329	22.809	68.695	2.00061
1.40721	17.2321	75.3678	7.40011	23.508	68.795	1.99439
1.45	19.442	73.2733	7.28472	24.567	73.976	2.89415
1.49286	13.5128	78.0179	8.46924	20.43	61.516	1.22149
1.53572	7.13791	83.366	9.49613	12.906	46.743	0.686535
1.57858	29.0922	65.2606	5.6472	33.025	94.199	6.99937
1.62144	13.2785	78.3588	8.36268	20.274	61.168	1.23276
1.6643	6.4138	84.997	8.58918	15.612	45.994	0.457736
1.70716	16.6394	75.573	7.78754	23.325	67.408	1.67465
1.75002	21.7216	72.3889	5.88947	29.753	74.498	2.24717
1.79288	4.91883	84.7898	10.2914	11.36	40.544	0.240797
1.83574	12.3737	79.0406	8.58569	20.415	59.077	0.732247
1.8786	10.996	80.5897	8.41434	19.302	56.395	0.755692
1.92146	11.2248	79.9602	8.81506	18.312	56.899	0.773825
1.96432	13.7466	77.2298	9.02356	19.241	61.822	0.842965
2.00718	21.3463	71.8945	6.75921	29.068	72.936	1.39885
2.05	17.6398	74.3479	8.01235	22.998	69.745	2.00509
2.08846	12.7497	77.6683	9.58202	16.742	60.805	1.4252
2.12692	15.1332	76.5581	8.30867	21.353	65.103	1.65044
2.16538	19.4306	72.9259	7.64352	24.367	73.151	2.58646
2.20384	16.3906	74.6443	8.96515	21.842	66.048	1.015
2.2423	16.2651	75.5739	8.16098	21.74	67.485	1.95474
2.28076	15.7922	76.2148	7.99301	22.423	65.602	1.27382
2.31922	14.637	76.7768	8.58623	20.594	63.943	1.44263
2.35768	31.0318	63.5302	5.43792	37.062	87.363	4.16085
2.39614	44.2322	52.3202	3.44765	49.661	99.166	6.74473
2.4346	38.6386	56.8961	4.46526	44.667	94.157	5.40196
2.47306	44.2064	51.8469	3.9467	49.036	103.366	8.23272
2.51152	36.0826	59.0317	4.88565	41.409	95.243	6.15023
2.54998	23.5854	68.7767	7.63793	26.286	79.602	3.02174
2.58844	22.199	69.992	7.80903	25.669	77.297	2.86767
2.6269	27.9603	65.7347	6.30501	32.116	87.378	4.73046
2.66536	26.9338	67.8367	5.22949	33.147	82.515	3.15397
2.70382	38.2253	57.7566	4.01809	44.835	91.726	4.57975
2.74228	14.2703	75.2724	10.4573	16.499	65.193	3.0674
2.78074	27.7956	64.5857	7.61877	29.959	87.798	4.86648
2.8192	37.7997	56.817	5.38325	42.3	98.692	7.06211
2.85766	14.1101	77.3681	8.52173	20.921	62.631	1.28536
2.89612	15.2719	76.576	8.15204	22.435	64.507	1.25757
2.93458	8.82925	81.5441	9.6266	16.17	51.599	0.486852
2.97304	25.847	67.8778	6.27518	29.554	93.987	7.59111
3.0115	37.3508	59.0289	3.62033	43.658	100.498	8.13409
3.05	48.8315	48.7337	2.43489	53.494	111.335	10.8545
3.09049	13.3621	78.1838	8.45403	19.985	61.22	1.05806
3.13098	17.1864	74.5593	8.25434	23.027	68.68	1.95633
3.17147	14.6178	76.6579	8.72434	20.891	63.936	1.55714
3.21196	16.8449	75.0161	8.13908	22.337	68.685	2.16151
3.25245	17.0145	74.3157	8.66978	22.032	68.362	1.75774
3.29294	15.0691	76.4673	8.46361	21.623	64.81	1.58845
3.33343	16.34	75.5918	8.06824	22.782	66.934	1.65268
3.37392	16.995	74.7861	8.21894	22.666	68.436	1.9046
3.41441	18.7997	73.2387	7.96153	23.395	72.623	2.58747
3.4549	16.6934	75.1697	8.13688	23.436	66.791	1.38685
3.49539	22.0646	70.7063	7.22911	26.531	78.5	3.39393
3.53588	16.3021	75.0506	8.64733	21.231	67.524	1.91792
3.57637	14.8741	76.185	8.94091	20.258	64.772	1.701
3.61686	17.2705	75.018	7.71148	23.988	68.276	1.76896
3.65735	18.4303	73.6645	7.90514	23.402	71.143	2.27633
3.69784	12.2132	78.1929	9.59399	18.571	59.159	1.1735
3.73833	8.1525	81.2006	10.6469	15.107	50.024	0.509068
3.77882	15.1097	77.1139	7.77643	22.52	63.816	0.60478
3.81931	27.6007	66.6126	5.78666	34.547	82.529	3.2856
3.8598	34.7783	60.8541	4.36758	40.13	103.117	8.902
3.90029	31.7721	63.3848	4.84307	38.313	89.017	4.79748
3.94078	23.2459	70.3307	6.42347	28.803	79.807	3.62087
3.98127	11.5491	79.7895	8.66141	16.391	58.514	3.09599
4.02176	22.6894	69.9219	7.38875	26.618	83.077	5.21463
4.06225	16.0235	75.4142	8.56234	19.347	68.371	2.43016
4.10274	18.1593	74.5212	7.31943	24.129	71.722	2.87543
4.14323	21.8327	71.93	6.23736	28.014	77.584	3.54455
4.18372	24.5148	69.5772	5.90801	30.566	80.229	3.05562
4.22421	50.3568	46.6302	3.01291	54.849	145.594	17.8394
4.2647	43.2869	53.0256	3.68758	47.687	117.549	12.2566
4.30519	22.8226	71.1696	6.00783	29.362	77.845	3.04892
4.34568	30.3509	64.1696	5.47952	34.467	93.695	6.72158
4.38617	31.6252	62.6396	5.73523	35.549	99.825	8.01381
4.42666	15.949	76.3665	7.68447	22.312	63.562	0
4.46715	22.009	71.1936	6.79736	26.054	83.325	5.7019
4.50764	30.6532	63.8354	5.51138	37.289	80.932	1.18751
4.54813	34.8331	59.7113	5.4556	39.742	100.832	8.26219
4.58862	27.2685	67.1135	5.61807	34.063	82.271	3.07364
4.62911	25.4987	68.069	6.43227	31.117	80.932	3.13216
4.6696	15.4505	75.792	8.7575	19.501	65.796	1.18567
4.71009	40.0773	55.6896	4.23312	45.88	96.395	6.04318
4.75058	40.8831	56.1227	2.99424	46.975	98.08	6.84707
4.79107	59.8993	38.1735	1.92718	65.324	174.532	23.6728
4.83156	52.1143	45.5715	2.31421	56.7	138.63	17.5378
4.87205	61.3634	37.032	1.60462	62.083	104.091	8.13927
4.91254	50.5779	46.2982	3.1239	55.087	161.78	19.094
4.95303	38.1716	57.337	4.49139	42.019	112.751	10.96
4.99352	49.1147	48.5029	2.38235	53.684	114.749	11.8719
5.03401	52.6604	45.3283	2.01136	57.341	152.934	19.7182
5.0745	46.5088	50.0651	3.42603	50.886	122.561	13.7083
5.11499	30.5714	63.8857	5.54295	36.113	89.849	5.18946
5.15548	49.3467	48.0079	2.64541	53.818	124.038	14.3935
5.19597	33.7337	62.9766	3.28967	40.36	91.159	5.00023
5.23646	51.5492	46.0046	2.4462	55.972	125.661	14.8911
5.27695	47.7617	49.9074	2.33096	52.422	115.673	12.0742
5.31744	63.7824	34.5634	1.65421	69.013	160.597	23.7465
5.35793	36.1307	58.084	5.78536	38.342	113.972	11.159
5.39842	22.1231	70.6148	7.26207	25.76	82.111	4.98244
5.43891	27.5922	66.3999	6.00796	32.058	89.149	5.62543
5.4794	51.4134	46.0912	2.49541	55.765	115.01	12.2351
5.52	41.6346	53.8853	4.48012	46.409	103.878	8.56052
5.56036	64.3503	33.8256	1.82411	69.829	152.182	23.5312
5.60072	57.7259	39.6632	2.61088	63.311	147.087	20.8807
5.64108	60.7733	37.289	1.93777	65.068	135.143	18.9144
5.68144	52.3117	45.0071	2.6812	56.901	131.602	15.5814
5.7218	57.3714	40.6195	2.00907	61.641	135.826	18.0558
5.76216	64.6241	33.8273	1.54862	67.607	127.348	17.7405
5.80252	64.1682	34.1223	1.7095	66.809	122.43	16.0814
5.84288	62.7174	35.1305	2.15207	65.678	120.74	15.3326
5.88324	66.5754	31.7034	1.72127	68.927	124.903	17.3342
5.9236	73.9987	25.0399	0.961376	74.251	130.343	19.9669
5.96396	66.3826	31.8893	1.72809	69.883	132.824	19.8539
6.00432	59.5726	38.1292	2.29819	63.011	119.31	14.4457
6.04468	70.6037	27.9218	1.47446	73.568	133.234	21.2376
6.08504	72.0148	26.0267	1.95855	77.061	140.961	24.8288
6.1254	79.2727	19.3619	1.36538	86.451	155.745	32.2092
6.16576	68.9332	28.354	2.71279	77.548	150.409	27.5659
6.20612	46.2788	49.1843	4.53687	50.192	116.657	12.7162
6.24648	56.1429	39.9362	3.92088	61.922	131.341	18.5442
6.28684	35.3316	58.0426	6.62575	36.131	106.347	9.40241
6.3272	35.7219	58.5445	5.73359	39.995	97.638	6.87135
6.36756	44.2778	51.0423	4.6799	48.241	113.317	11.5091
6.40792	17.8263	73.5631	8.61067	22.832	71.582	2.86487
6.44828	59.1257	37.9417	2.93263	64.731	145.093	21.0902
6.48864	52.5386	43.6342	3.82721	57.43	135.531	17.7791
6.529	60.556	36.7161	2.72789	65.612	138.324	20.0926
6.56936	73.0704	25.4083	1.52131	77.977	146.625	26.1857
6.60972	41.01	52.7001	6.28995	43.051	120.177	12.9285
6.65	49.1455	47.3175	3.53701	53.712	109.635	10.4172
6.68929	73.223	25.511	1.26599	84.664	189.625	34.5775
6.72858	64.3933	33.8245	1.78218	70.52	149.814	24.2528
6.76787	61.7478	36.1861	2.06616	68.56	154.142	22.8392
6.80716	69.8741	28.8589	1.26696	76.872	170.58	23.6642
6.84645	68.8304	29.4058	1.76377	76.292	154.95	27.1585
6.88574	67.2027	31.3768	1.42046	75.327	185.271	21.5444
6.92503	69.8628	28.7166	1.42065	74.813	142.917	24.1396
6.96432	67.5015	30.9079	1.59054	72.734	142.508	23.464
7.00361	61.4359	36.2107	2.35336	66.375	134.12	19.6131
7.0429	62.6002	35.228	2.17186	67.202	131.176	19.1384
7.08219	62.3144	35.2765	2.40916	66.969	129.012	18.4902
7.12148	50.2794	45.7963	3.92431	54.837	132.037	16.6419
7.16077	53.8917	42.3134	3.79492	58.649	121.086	14.7343
7.20006	63.1715	34.3805	2.44803	67.954	131.555	19.4341
7.23935	65.1009	32.7379	2.1612	70.655	140.99	22.4831
7.27864	65.1981	33.0146	1.78734	68.737	128.057	18.4419
7.31793	63.366	34.2758	2.35822	68.124	140.107	20.9617
7.35722	55.9071	40.2776	3.8153	62.043	150.91	22.0262
7.39651	73.0863	24.67	2.24374	89.684	180.363	37.9005
7.4358	72.9317	25.2223	1.84599	87.661	175.524	36.3157
7.47509	76.2986	22.4819	1.2195	87.619	164.392	34.6428
7.51438	68.2594	30.0141	1.72652	78.471	159.48	29.8756
7.55367	57.3357	40.1075	2.55687	62.756	135.146	19.296
7.59296	57.6151	39.4263	2.95858	64.004	138.31	20.8126
7.63225	62.5284	34.5575	2.91415	70.004	144.308	23.7985
7.67154	64.9561	32.3092	2.73474	73.506	148.848	25.9938
7.71083	63.1492	34.2536	2.59717	71.709	149.345	25.5075
7.75	44.3121	51.1644	4.52346	47.704	115.274	12.1868
7.78929	49.9718	46.2123	3.81592	54.47	105.96	9.06672
7.82858	52.8053	44.5728	2.62186	56.92	112.392	11.4328
7.86787	30.4105	63.4186	6.17099	33.722	90.927	5.26093
7.90716	39.6413	55.473	4.88568	43.906	103.02	8.34937
7.94645	31.4454	63.1116	5.44309	36.895	90.967	5.40025
7.98574	28.3262	63.6099	8.06387	25.823	95.211	6.73488
8.02503	42.7319	51.6007	5.66736	45.182	115.084	12.0177
8.06432	50.9158	44.8734	4.2108	55.615	124.633	15.5552
8.10361	49.2009	46.1188	4.68023	53.524	125.544	15.6234
8.1429	75.7046	22.8892	1.4062	81.918	151.595	29.0379
8.18219	16.6265	75.3625	8.01101	17.13	73.942	3.60448
8.22148	47.3253	48.5962	4.07849	50.81	146.928	19.1066
8.26077	39.0356	54.6845	6.27988	38.4	124.724	14.0037
8.30006	35.7131	57.6667	6.62022	35.259	113.915	11.3292
8.33935	74.6905	23.8444	1.46511	83.09	155.068	30.6381
8.37864	48.8699	46.362	4.76816	52.74	155.356	21.2847
8.41793	36.3079	56.3697	7.32236	32.636	128.452	14.4419
8.45722	45.144	49.8581	4.99795	48.392	121.22	13.8874
8.49651	62.9966	33.9435	3.05984	69.27	136.273	21.4022
8.5358	21.1944	69.8261	8.97956	19.566	93.654	8.07894
8.57509	26.8984	66.448	6.65364	23.36	94.793	6.73999
8.61438	34.6028	58.4107	6.98652	30.918	123.324	13.1204
8.65367	49.7407	45.1614	5.0979	54.1	187.533	23.5777
8.69296	4.77733	83.9167	11.306	9.912	39.69	0.054837
8.73225	24.4271	68.4542	7.11866	27.785	84.018	4.65113
8.77154	54.5835	42.552	2.86444	58.775	118.697	13.6979
8.81083	36.0752	58.0237	5.90111	37.192	113.039	11.0623
8.85	38.5569	55.9869	5.45623	42.24	108.886	10.1057
8.90238	16.2195	76.3897	7.39075	20.097	69.777	3.66216
8.95476	10.8538	79.0545	10.0917	13.138	56.421	0.941164
9.00714	7.11784	83.0091	9.87306	15.907	48.017	0.0917853
9.05952	2.64448	86.642	10.7135	10.641	34.858	0.024659
9.1119	13.3933	77.0545	9.55224	17.795	61.963	1.46665
9.16428	52.6625	44.1434	3.19413	57.568	146.501	19.6202
9.21666	19.9431	71.4565	8.60037	20.607	75.926	2.89026
9.26904	39.1918	54.3257	6.48254	33.602	209.426	22.9901
9.32142	21.8117	70.6332	7.55513	27.13	74.527	1.64222
9.3738	11.7208	79.144	9.13512	15.759	58.227	1.22461
9.42618	42.8947	52.8726	4.2327	47.977	102.826	8.18579
9.47856	3.35341	84.8564	11.7902	9.842	36.834	0.0363162
9.53094	2.93329	83.9943	13.0724	7.955	32.906	0.0883426
9.58332	59.1937	38.4506	2.35579	63.047	133.709	17.8826
9.6357	61.075	36.1684	2.75662	72.12	325.05	36.0446
9.68808	79.8639	18.2703	1.86586	182.965	460.65	69.5615
9.74046	73.6265	24.5641	1.80936	121.641	386.295	53.6999
9.79284	65.1608	32.9032	1.93601	69.077	132.488	19.6133
9.84522	53.7561	43.5914	2.6525	58.149	125.968	15.3207
9.8976	55.0877	42.4169	2.49536	59.08	114.002	12.1824
9.95	53.4753	42.4093	4.11541	59.089	239.862	23.5299
9.994	71.8923	25.9077	2.19999	104.261	262.634	42.8596
10.038	65.3601	30.9102	3.72972	86.423	210.488	39.3365
